# Supplementary material
Source: PubMed Central journal article supplement (PMC3116445)
Supplement: NIHMS292877-supplement-supp.pdf [file NIHMS292877-supplement-supp.pdf]

## Supplemental Information

### **Startle magnitude: Raw scores**

In general, the statistical results were more significant with the raw scores than with the T scores.

### **Fear-potentiated startle**

The Stimulus Type (cue, ITI) x Condition (N, P) x Drug (3) ANOVA revealed no significant 3-way interaction. A more specific analysis restricted to the high dose of hydrocortisone in the P condition reveal no significant Drug x Stimulus Type interaction ( $F(1,21) = .3, p = .59$ ). Hence, startle potentiation to the threat cue (relative to ITI) was not affected by hydrocortisone.

### **Anxiety-potentiated startle**

The Drug (3) x Condition (N, P, U) ANOVA revealed a Condition x Drug linear trend ( $F(1,21) = 8.0, p = .01$ ). Follow up tests revealed that the high hydrocortisone treatment increased ITI startle in U compared to N (Condition x Drug:  $F(1,21) = 8.0, p = .01$ ) and in N compared to P (Condition x Drug:  $F(1,21) = 6.5, p = .018$ ).

### **Subjective anxiety, state anxiety, and pain**

The subjective anxiety ratings were not affected by drug treatment (Table S1). They were analyzed in an analogous manner as the startle data.

**Fear:** As expected, based on prior data, subjective anxiety to the cues (relative to ITI) was greater in the P condition, where cues reliably signaled threats, as compared to the N condition (Stimulus Type x Condition:  $F(1,21) = 65.0, p < .0001, GG-\epsilon = .92$ ). This effect was not affected by hydrocortisone, as reflected by non significant Stimulus Type x Condition x Drug ( $F(2,42) = 1.9, ns$ ). An analysis restricted to the high hydrocortisone in the P condition also did not reveal any effect of drug treatment ( $F(1,21) = 1.6, ns$ ).

**Anxiety:** Like ITI startle amplitude in the current experiment and like prior results with this paradigm in other experiments, subjective anxiety increased linearly from the N to the P to the U

condition (Condition linear trend:  $F(1,21) = 155.5, p < .0001$ ). This effect was not affected by drug treatment (Drug x Condition linear trend:  $F(1,21) = .2, ns$ ).

**State anxiety:** State anxiety scores (Table S2) were analyzed using a Drug (3) x Time (4) ANOVA. There was a main Time effect ( $F(3,63) = 8.4, p < .001, GG-\epsilon = .48$ ) due to increased anxiety from post-drug to after the first threat block ( $F(1,21) = 19.9, p < .0009$ ). The Drug x Time interaction was not significant ( $F(1,21) = .9, ns$ ), indicating that hydrocortisone did not affect baseline state anxiety.

**Pain:** Pain rating of shock did not differ significantly among treatments ( $F(2,40) = .3, ns$ ). The ratings were 6.5 (SEM = .34), 6.4 (SEM = .30), 6.6 (SEM = .31) in the placebo, low hydrocortisone, and high hydrocortisone treatments, respectively.

**Table S1.** Mean (SEM) retrospective rating of anxiety during the cue and ITI across treatments and conditions

|                               | Neutral  |          | Predictable |          | Unpredictable |          |
|-------------------------------|----------|----------|-------------|----------|---------------|----------|
|                               | ITI      | Cue      | ITI         | Cue      | ITI           | Cue      |
| <b>Placebo</b>                | 1.6 (.2) | 1.5 (.2) | 3.4 (.4)    | 5.8 (.5) | 6.0 (.5)      | 6.2 (.5) |
| <b>Hydrocortisone (20 mg)</b> | 1.4 (.2) | 1.6 (.2) | 3.6 (.4)    | 5.7 (.5) | 6.1 (.4)      | 6.1 (.5) |
| <b>Hydrocortisone (60 mg)</b> | 1.8 (.2) | 1.8 (.2) | 3.6 (.4)    | 6.4 (.4) | 6.5 (.5)      | 6.7 (.5) |

**Table S2.** Mean (SEM) state anxiety at three time points during testing

|                               | Pre-drug   | Post-drug  | After 1st threat series | After 2 <sup>nd</sup> threat series |
|-------------------------------|------------|------------|-------------------------|-------------------------------------|
| <b>Placebo</b>                | 30.3 (2.2) | 29.5 (1.8) | 35.1 (2.9)              | 33.8 (3.0)                          |
| <b>Hydrocortisone (20 mg)</b> | 28.5 (1.6) | 28.9 (1.0) | 32.2 (1.5)              | 32.4 (1.5)                          |
| <b>Hydrocortisone (60 mg)</b> | 32.7 (1.5) | 29.7 (1.2) | 36.2 (1.8)              | 34.1 (1.8)                          |
